# Supplementary material
Source: MDPI journal article supplement (https://www.mdpi.com/2079-9292/13/2/281)
Supplement: s1 [file s1]

Archive with 2 entries (2 files):
- File S1 - Metric_EN.pdf
- File S2 - Hellblade evaluation_EN.pdf
